# Supplementary material for: Immune microenvironment in ductal carcinoma in situ: a comparison with invasive carcinoma of the breast
Source: Springer Nature journal article supplement (doi:10.1186/s13058-020-01267-w), 2020-03-26
Supplement: MOESM1 [file 17835306]

**Table S1. Correlations in infiltration of CD4+, CD8+, and FOXP3+ tumor infiltrating lymphocytes and PD-L1+ immune cells in pure ductal carcinoma in situ**

| Correlation between markers | CD4+ TIL       | CD8+ TIL       | FOXP3+ TIL     | PD-L1+ IC      |
|-----------------------------|----------------|----------------|----------------|----------------|
| CD4+ TIL                    | -              | 0.566 (<0.001) | 0.471 (<0.001) | 0.404 (<0.001) |
| CD8+ TIL                    | 0.566 (<0.001) | -              | 0.418 (<0.001) | 0.310 (<0.001) |
| FOXP3+ TIL                  | 0.471 (<0.001) | 0.418 (<0.001) | -              | 0.417 (<0.001) |
| PD-L1+ IC                   | 0.404 (<0.001) | 0.310 (<0.001) | 0.417 (<0.001) | -              |

Data are presented as rho correlation coefficients calculated by Spearman's rank correlation test and p values in parentheses.

TIL, tumor-infiltrating lymphocyte; IC, immune cell
