# Supplementary material for: Immune microenvironment in ductal carcinoma in situ: a comparison with invasive carcinoma of the breast
Source: Springer Nature journal article supplement (doi:10.1186/s13058-020-01267-w), 2020-03-26
Supplement: MOESM2 [file 17835306]

**Table S2. Summary of 6 cases with ipsilateral breast recurrence**

| Serial No. | Extent of DCIS (cm) | Nuclear grade | HR | HER2 | Node status | Surgery | Safety margin (cm) | Adjuvant radiation therapy | Adjuvant endocrine therapy | Time to recurrence (year) | Type of recurred tumor |
|------------|---------------------|---------------|----|------|-------------|---------|--------------------|----------------------------|----------------------------|---------------------------|------------------------|
| 10         | 1.5                 | 2             | +  | -    | Nx          | BCS     | 0.5                | +                          | -                          | 4.96                      | DCIS                   |
| 23         | 2.0                 | 3             | -  | -    | Nx          | BCS     | 0.4                | +                          | -                          | 2.79                      | IDC                    |
| 41         | 1.6                 | 3             | +  | -    | Nx          | BCS     | 1.0                | +                          | -                          | 4.24                      | DCIS                   |
| 45         | 4.0                 | 2             | +  | -    | Nx          | BCS     | <0.1               | +                          | +                          | 6.32                      | IDC                    |
| 81         | 2.7                 | 2             | +  | -    | Nx          | BCS     | 0.9                | +                          | +                          | 3.78                      | DCIS                   |
| 166        | 0.8                 | 2             | +  | -    | Nx          | BCS     | 2.0                | +                          | +                          | 0.63                      | DCIS                   |

HR, hormone receptor; BCS, breast conserving surgery; DCIS, ductal carcinoma in situ; IDC, invasive ductal carcinoma
